# Supplementary material
Source: MDPI journal article supplement (https://www.mdpi.com/2073-4441/12/12/3487)
Supplement: s1 [file s1]

Supplementary S1. Michigan IRB Approval Form

**MICHIGAN STATE**  
**UNIVERSITY**

**Initial Study APPROVAL**

February 6, 2018

To: Bridget K Behe

Re: **MSU Study ID:** STUDY00000196

**IRB:** SIRB

**Principal Investigator:** Bridget K Behe

**Category:** 6, 7

**Submission:** Initial Study STUDY00000196

**Submission Approval Date:** 2/6/2018

**Effective Date:** 2/6/2018

**Project Expiration Date:** 2/5/2019

Title: Consumer Assessment of Plant Displays for Water Use

This submission has been approved by the Michigan State University (MSU) SIRB. The submission was reviewed by the Institutional Review Board (IRB) through the Non-Committee Review procedure. The IRB has found that this research project protects the rights and welfare of human subjects and meets the requirements of MSU's Federal Wide Assurance (FWA00004556) and the federal regulations for the protection of human subjects in research (e.g., 45 CFR 46, 21 CFR 50, 56, other applicable regulations).

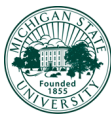

**Office of  
Regulatory  
Affairs  
Human Research  
Protection Program**

4000 Collins Road  
Suite 136  
Lansing, MI 48910

517-355-2180  
Fax: 517-432-4503  
Email: [irb@msu.edu](mailto:irb@msu.edu)  
[www.hrpp.msu.edu](http://www.hrpp.msu.edu)

**Please note that no research may occur at University of Florida, Apopke or Texas A&M University until their IRBs have either finalized a reliance agreement with us or have conducted their own review and approved this study.**

**Documents Approved:**

- Recruitment advertisement ET survey.docx, Category: Other;
- Online Survey.pdf, Category: Other;
- Recruitment advertisement ET survey.docx, Category: Recruitment Materials;
- HRP 503 v3, Category: IRB Protocol;
- Screening Survey.pdf, Category: Other;
- WateR3 - proposal.pdf, Category: Other;
- Consent form v2, Category: Consent Form;

**Continuing Review:** IRB approval is valid until the expiration date listed above. If the research continues to involve human subjects, you must submit a Continuing Review request at least one month before expiration.

**Modifications:** Any proposed change or modification with certain limited exceptions discussed below must be reviewed and approved by the IRB prior to implementation of the change. Please submit a Modification request to have the

## Supplementary S2. Texas IRB Approval Form

DIVISION OF RESEARCH

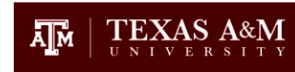

### EXEMPTION DETERMINATION

February 23, 2018

|                      |                                                                                                                                                                         |
|----------------------|-------------------------------------------------------------------------------------------------------------------------------------------------------------------------|
| Type of Review:      | Initial Review                                                                                                                                                          |
| Title:               | Consumer Assessment of Plant Displays for Water Use                                                                                                                     |
| Investigator:        | Charles R Hall                                                                                                                                                          |
| IRB ID:              | IRB2018-0108M                                                                                                                                                           |
| Reference Number:    | 071231                                                                                                                                                                  |
| Funding:             | USDA - NIFA                                                                                                                                                             |
| Documents Reviewed:  | IRB Application Version 1.1; Consent form Version 3.1; Screening Survey Version 1.0; Newspaper/Website Recruitment Advertisement Version 2.1; Online Survey Version 1.0 |
| Risk Level of Study: | Not Greater than Minimal Risk under 45 CFR 46 / 21 CFR 56                                                                                                               |

Dear Charles R Hall:

The HRPP determined on 02/23/2018 that this research meets the criteria for Exemption in accordance with 45 CFR 46.101(b) under Category 2: Research involving the use of educational tests (cognitive, diagnostic, aptitude, achievement), survey procedures, interview procedures or observation of public behavior unless: the information is recorded in an identifiable manner and any disclosure of the subjects' responses outside of research could reasonably place the subject at risk of criminal or civil liability or be damaging to the subjects' financial standing, employability or reputation.

Your exemption is good for five (5) years from the Approval Start Date. At that time, you must contact the IRB with your intent to close the study or request a new determination.

If you have any questions, please contact the IRB Administrative Office at 1-979-458-4067, toll free at 1-855-795-8636.

Sincerely,  
IRB Administration

750 Agronomy Road, Suite 2701  
1186 TAMU  
College Station, TX 77843-1186

Tel. 979.458.1467 Fax. 979.862.3176  
<http://rcb.tamu.edu>

**Supplementary S3. Data Script SAS**

The following are available online at

**Supplementary S4. Dataset for SAS**

The following are available online at

**Supplementary S5. Data Script STATA**

The following are available online at

**Supplementary S6. Dataset for STATA**

The following are available online at

# Supplementary S7. Knowledge Quiz

**Table S1.** Item and response options for a Real Knowledge Quiz developed by B. Behe, in 2017. Each item is worth one point. Items are scored as correct (1) or incorrect (0). Mean and standard deviations of the item scores represent the combined participants (N=1,129) of nine studies, 2017 – 2020.

| Item ID | Item                                                                                                       | Response Option 1                                     | Response Option 2                                      | Response Option 3                          | Response Option 4     | Response Option 5     | Score Mean (S.D.) |
|---------|------------------------------------------------------------------------------------------------------------|-------------------------------------------------------|--------------------------------------------------------|--------------------------------------------|-----------------------|-----------------------|-------------------|
| 1       | How long does it take for an annual plant produce seed?                                                    | <b>One growing season.</b>                            | Two growing seasons.                                   | Three or more growing seasons.             | Don't know or unsure. |                       | 0.673 (0.469)     |
| 2       | True or false, in northern climates, annual plants should be planted after the danger of frost has passed. | <b>True</b>                                           | FALSE                                                  | Don't know or unsure.                      |                       |                       | 0.688 (0.463)     |
| 3       | Which of the following is not an annual plant?*                                                            | <b>Hosta</b>                                          | Impatiens                                              | Marigold                                   | Petunia               | Don't know or unsure. | 0.469 (0.499)     |
| 4       | Most annual plants generally grow best in which type of soil?                                              | Clay                                                  | Sand                                                   | <b>Sandy loam</b>                          | Don't know or unsure. |                       | 0.486 (0.500)     |
| 5       | True or false, some annual plants make good cut flowers like zinnias, snapdragon, and celosia.             | <b>True</b>                                           | FALSE                                                  | Don't know or unsure.                      |                       |                       | 0.585 (0.493)     |
| 6       | Annuals are most often started from                                                                        | Budding                                               | Grafting                                               | <b>Seed</b>                                | Don't know or unsure. |                       | 0.566 (0.496)     |
| 7       | In order to flower, many annual plants need how much direct sunlight in order to grow and flower?          | Generally, only 2-4 hours of direct sunlight per day. | <b>Generally 6-8 hours of direct sunlight per day.</b> | Generally, 24 hours of sunlight is needed. | Don't know or unsure. |                       | 0.596 (0.491)     |
| 8       | Which of the following is not an annual plant?                                                             | <b>Apple</b>                                          | Watermelon                                             | Squash                                     | Don't know or unsure. |                       | 0.435 (0.496)     |
| 9       | Which of the following is not a perennial plant?                                                           | <b>Begonia</b>                                        | Coreopsis                                              | Day lily                                   | Don't know or unsure. |                       | 0.378 (0.485)     |
| 10      | How much water do most annual plants need to thrive in summer?                                             | Very little, less than 1" of rain per month.          | <b>Some, about 1" of rain per week.</b>                | A lot, about 1" of rain per day.           | Don't know or unsure. |                       | 0.598 (0.491)     |

\*Correct answers are shown in bold font style.

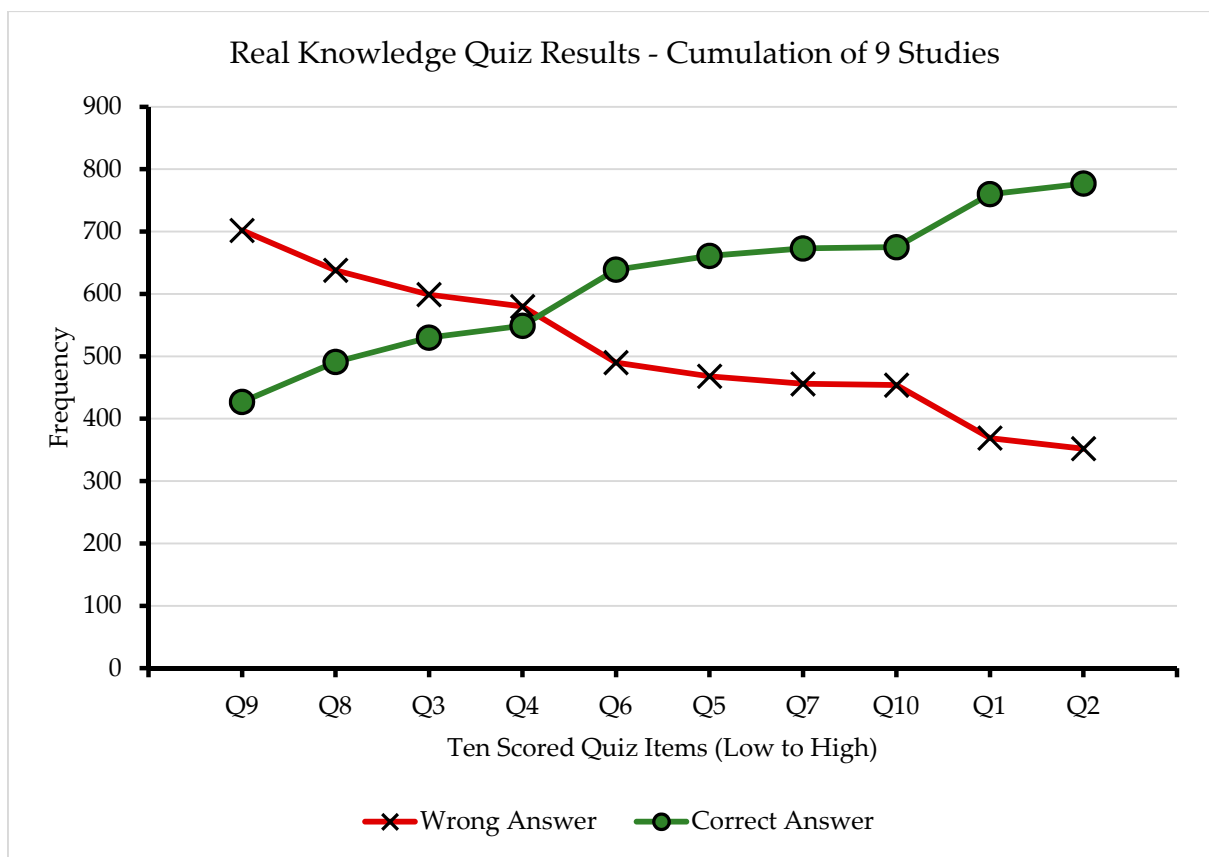

**Figure S1.** Graphical representation of monotonic trace lines for the correctly and incorrectly answered ten quiz items given to the combined participants (N=1,129) of nine studies, 2017 – 2020. See page 398 – 399 of Handbook of Test Development, edited by Suzanne Lane, et al., Taylor & Francis Group, 2015. ProQuest Ebook Central, <https://ebookcentral-proquest-com.proxy1.cl.msu.edu/lib/michstate-ebooks/detail.action?docID=4185727>.

**Table S2.** Means and standard deviations for correct answers for each item in the 10-question Annual Plant Knowledge in Study 1. Test given to participants of an online survey in the Midwest US on March 28, 2017. N, Mean (S.D.) = 164, 5.579 (2.645). The overall Cronbach's alpha for the standardized variables was 0.750.

| Item | N Correct | Mean (SD)     | Alpha |
|------|-----------|---------------|-------|
| 1    | 105       | 0.640 (0.481) | 0.735 |
| 2    | 129       | 0.787 (0.411) | 0.739 |
| 3    | 76        | 0.463 (0.500) | 0.719 |
| 4    | 64        | 0.390 (0.489) | 0.729 |
| 5    | 121       | 0.738 (0.441) | 0.732 |
| 6    | 101       | 0.616 (0.488) | 0.737 |
| 7    | 92        | 0.561 (0.498) | 0.727 |
| 8    | 84        | 0.512 (0.501) | 0.715 |
| 9    | 46        | 0.280 (0.451) | 0.730 |
| 10   | 97        | 0.591 (0.493) | 0.732 |

**Table S3.** Means and standard deviations for correct answers for each item in the 10-question Annual Plant Knowledge Test given to participants during the survey portion of an in-lab (glasses) eye tracking study in May 2017, East Lansing, MI. N, Mean (S.D.) = 92, 6.043 (2.882). The overall Cronbach's alpha for the standardized variables was 0.814 in Study 2.

| Item | N Correct | Mean (SD)     | Alpha |
|------|-----------|---------------|-------|
| 1    | 66        | 0.717 (0.453) | 0.793 |
| 2    | 77        | 0.837 (0.371) | 0.804 |
| 3    | 45        | 0.489 (0.503) | 0.786 |
| 4    | 49        | 0.533 (0.502) | 0.785 |
| 5    | 52        | 0.565 (0.498) | 0.808 |
| 6    | 58        | 0.630 (0.485) | 0.803 |
| 7    | 65        | 0.707 (0.458) | 0.797 |
| 8    | 59        | 0.641 (0.482) | 0.797 |
| 9    | 27        | 0.293 (0.458) | 0.804 |
| 10   | 58        | 0.630 (0.485) | 0.797 |

**Table S4.** Sociodemographic profiles of respondents in Study 2 (N=92).

| Profile               | Frequency | Percentage | Correct of 10<br>Mean (S.D.) | F, p          |
|-----------------------|-----------|------------|------------------------------|---------------|
| <i>Gender</i>         |           |            |                              |               |
| Male                  |           |            | 5.7 (3.2)                    | n.s.          |
| Female                |           |            | 6.2 (2.7)                    |               |
| <i>Race</i>           |           |            |                              |               |
| Caucasian             | 63        | 68.48      | 6.95 a (2.47)                | 25.16, <.0001 |
| Others                | 29        | 31.52      | 4.07 b (2.75)                |               |
| <i>Education</i>      |           |            |                              |               |
| Less than 4 yr degree |           |            | 5.8 (3.0)                    | n.s.          |
| 4 yr degree or higher |           |            | 6.1 (2.9)                    |               |

**Table S5.** Means and standard deviations for correct answers for each item in the 10-question Annual Plant Knowledge Test given to participants during the survey portion of an in-store (glasses) eye tracking study in May 2017, East Lansing, MI. N, Mean (S.D.) = 32, 4.938 (2.602). The overall Cronbach's alpha for the standardized variables was 0.756 in Study 3.

| Item | N Correct | Mean (SD)     | Alpha |
|------|-----------|---------------|-------|
| 1    | 15        | 0.469 (0.507) | 0.752 |
| 2    | 25        | 0.781 (0.420) | 0.721 |
| 3    | 11        | 0.344 (0.483) | 0.731 |
| 4    | 13        | 0.406 (0.499) | 0.738 |
| 5    | 18        | 0.563 (0.504) | 0.724 |
| 6    | 16        | 0.500 (0.508) | 0.744 |
| 7    | 22        | 0.688 (0.471) | 0.739 |
| 8    | 13        | 0.406 (0.499) | 0.726 |
| 9    | 2         | 0.063 (0.246) | 0.757 |
| 10   | 23        | 0.719 (0.457) | 0.727 |

**Table S6.** Sociodemographic profiles of respondents in Study 3 (N=32).

| Profile               | Frequency | Percentage | Correct of 10<br>Mean (S.D.) | F, p |
|-----------------------|-----------|------------|------------------------------|------|
| <i>Gender</i>         |           |            |                              |      |
| Male                  |           |            | 4.1 (2.6)                    | n.s. |
| Female                |           |            | 5.3 (2.6)                    |      |
| <i>Race</i>           |           |            |                              |      |
| Caucasian             | 21        | 65.63      | 5.048 (3.008)                | n.s. |
| Others                | 11        | 34.38      | 4.727 (1.679)                |      |
| <i>Education</i>      |           |            |                              |      |
| Less than 4 yr degree |           |            | 5.1 (2.0)                    | n.s. |
| 4 yr degree or higher |           |            | 4.9 (2.8)                    |      |



**Table S7.** Means and standard deviations for correct answers for each item in the 10-question Annual Plant Knowledge Test given to participants during the survey portion of an in-lab (glasses) eye tracking study in May 2018, East Lansing, MI. N, Mean (S.D.) = 97, 5.216 (2.223). The overall Cronbach's alpha for the standardized variables was 0.636 in Study 4.

| Item | N Correct | Mean (SD)     | Alpha |
|------|-----------|---------------|-------|
| 1    | 70        | 0.722 (0.451) | 0.632 |
| 2    | 80        | 0.825 (0.382) | 0.621 |
| 3    | 33        | 0.340 (0.476) | 0.568 |
| 4    | 46        | 0.474 (0.502) | 0.630 |
| 5    | 57        | 0.588 (0.495) | 0.599 |
| 6    | 38        | 0.392 (0.491) | 0.611 |
| 7    | 65        | 0.670 (0.473) | 0.616 |
| 8    | 43        | 0.443 (0.499) | 0.585 |
| 9    | 13        | 0.134 (0.342) | 0.591 |
| 10   | 61        | 0.629 (0.486) | 0.653 |

**Table S8.** Sociodemographic profiles of respondents in Study 4 (N=97).

| Profile               | Frequency | Percentage | Correct of 10<br>Mean (S.D.) | F, p          |
|-----------------------|-----------|------------|------------------------------|---------------|
| <i>Gender</i>         |           |            |                              |               |
| Male                  |           |            | 5.5 (2.5)                    | n.s.          |
| Female                |           |            | 5.1 (2.1)                    |               |
| <i>Race</i>           |           |            |                              |               |
| Caucasian             | 56        | 57.73      | 5.893 (2.270)                | 13.91, 0.0003 |
| Others                | 41        | 42.27      | 4.293 (1.806)                |               |
| <i>Education</i>      |           |            |                              |               |
| Less than 4 yr degree |           |            | 4.7 (2.1)                    | n.s.          |
| 4 yr degree or higher |           |            | 5.4 (2.2)                    |               |

**Table S9.** Means and standard deviations for correct answers for each item in the 10-question Annual Plant Knowledge Test given to participants during the survey portion of an in-store (glasses) eye tracking study in May 2017, East Lansing, MI. N, Mean (S.D.) = 85, 4.906 (2.772). The overall Cronbach's alpha for the standardized variables was 0.797 in Study 5.

| Item | N Correct | Mean (SD)     | Alpha |
|------|-----------|---------------|-------|
| 1    | 59        | 0.694 (0.464) | 0.791 |
| 2    | 64        | 0.753 (0.434) | 0.770 |
| 3    | 24        | 0.282 (0.453) | 0.759 |
| 4    | 39        | 0.459 (0.501) | 0.764 |
| 5    | 37        | 0.435 (0.499) | 0.776 |
| 6    | 34        | 0.400 (0.493) | 0.803 |
| 7    | 59        | 0.694 (0.464) | 0.785 |
| 8    | 36        | 0.424 (0.497) | 0.776 |
| 9    | 14        | 0.165 (0.373) | 0.777 |
| 10   | 51        | 0.600 (0.493) | 0.788 |

**Table S10.** Sociodemographic profiles of respondents in Study 5 (N=85).

| Profile               | Frequency | Percentage | Correct of 10<br>Mean (S.D.) | F, p |
|-----------------------|-----------|------------|------------------------------|------|
| <i>Gender</i>         |           |            |                              |      |
| Male                  |           |            | 4.3 (3.1)                    | n.s. |
| Female                |           |            | 5.1 (2.6)                    |      |
| <i>Race</i>           |           |            |                              |      |
| Caucasian             | 60        | 70.59      | 5.100 (2.815)                | n.s. |
| Others                | 25        | 29.41      | 4.440 (2.663)                |      |
| <i>Education</i>      |           |            |                              |      |
| Less than 4 yr degree |           |            | 4.9 (3.0)                    | n.s. |
| 4 yr degree or higher |           |            | 4.9 (2.7)                    |      |

**Table S11.** Means and standard deviations for correct answers for each item in the 10-question Annual Plant Knowledge Test given to participants during the survey portion of an in-lab (screen) eye tracking study in August 2018, East Lansing, MI. N, Mean (S.D.) = 81, 5.469 (2.510). The overall Cronbach's alpha for the standardized variables was 0.716 in Study 6.

| Item | N Correct | Mean (SD)     | Alpha |
|------|-----------|---------------|-------|
| 1    | 60        | 0.741 (0.441) | 0.688 |
| 2    | 67        | 0.827 (0.380) | 0.714 |
| 3    | 26        | 0.321 (0.470) | 0.635 |
| 4    | 42        | 0.519 (0.503) | 0.715 |
| 5    | 44        | 0.543 (0.501) | 0.694 |
| 6    | 37        | 0.457 (0.501) | 0.702 |
| 7    | 50        | 0.617 (0.489) | 0.709 |
| 8    | 46        | 0.568 (0.498) | 0.656 |
| 9    | 22        | 0.272 (0.448) | 0.688 |
| 10   | 49        | 0.605 (0.492) | 0.725 |

**Table S12.** Sociodemographic profiles of respondents in Study 6 (N=81).

| Profile               | Frequency | Percentage | Correct of 10<br>Mean (S.D.) | F, p |
|-----------------------|-----------|------------|------------------------------|------|
| <i>Gender</i>         |           |            |                              |      |
| Male                  |           |            | 6.1 (2.7)                    | n.s. |
| Female                |           |            | 5.2 (2.4)                    |      |
| <i>Race</i>           |           |            |                              |      |
| Caucasian             | 50        | 61.73      | 5.800 (2.595)                | n.s. |
| Others                | 31        | 38.27      | 4.935 (2.308)                |      |
| <i>Education</i>      |           |            |                              |      |
| Less than 4 yr degree |           |            | 4.9 (2.2)                    | n.s. |
| 4 yr degree or higher |           |            | 5.6 (2.6)                    |      |

**Table S13.** Means and standard deviations for correct answers for each item in the 10-question Annual Plant Knowledge Test given to participants during the survey portion of an in-lab (screen) eye tracking study in Fall-Winter 2018 in Study 7. Testing was done in College Station, TX (Oct 2018, N=47) and East Lansing, MI (Dec. 2019, N=64). Overall N, Mean (S.D.) = 111, 4.856 (2.812). The overall Cronbach's alpha for the standardized variables was 0.786.

| Loc'n | N       | Correct | Item | Mean (SD)     | Alpha |
|-------|---------|---------|------|---------------|-------|
| MI    | 32      |         | 1    | 0.500 (0.504) | 0.736 |
| MI    | 42      |         | 2    | 0.656 (0.479) | 0.715 |
| MI    | 20      |         | 3    | 0.313 (0.467) | 0.708 |
| MI    | 30      |         | 4    | 0.469 (0.503) | 0.739 |
| MI    | 34      |         | 5    | 0.531 (0.503) | 0.698 |
| MI    | 27      |         | 6    | 0.422 (0.498) | 0.697 |
| MI    | 38      |         | 7    | 0.594 (0.495) | 0.710 |
| MI    | 24      |         | 8    | 0.375 (0.488) | 0.691 |
| MI    | 5       |         | 9    | 0.078 (0.270) | 0.702 |
| MI    | 36      |         | 10   | 0.563 (0.500) | 0.756 |
| MI    | Overall |         |      | 4.500 (2.551) | 0.737 |
| TX    | 30      |         | 1    | 0.638 (0.486) | 0.811 |
| TX    | 29      |         | 2    | 0.617 (0.491) | 0.827 |
| TX    | 17      |         | 3    | 0.362 (0.486) | 0.801 |
| TX    | 27      |         | 4    | 0.574 (0.500) | 0.817 |
| TX    | 28      |         | 5    | 0.596 (0.496) | 0.810 |
| TX    | 30      |         | 6    | 0.638 (0.486) | 0.834 |
| TX    | 27      |         | 7    | 0.574 (0.500) | 0.821 |
| TX    | 21      |         | 8    | 0.447 (0.503) | 0.812 |
| TX    | 14      |         | 9    | 0.298 (0.462) | 0.813 |
| TX    | 28      |         | 10   | 0.596 (0.496) | 0.819 |
| TX    | Overall |         |      | 5.340 (3.095) | 0.832 |

**Table S14.** Sociodemographic profiles of respondents in Study 7 (N=111).

| Profile               | Frequency | Percentage | Correct of 10<br>Mean (S.D.) | F, <i>p</i>  |
|-----------------------|-----------|------------|------------------------------|--------------|
| <i>Gender</i>         |           |            |                              |              |
| Male                  |           |            | 5.2 (3.1)                    | n.s.         |
| Female                |           |            | 4.6 (2.6)                    |              |
| <i>Race</i>           |           |            |                              |              |
| Caucasian             | 78        | 70.27      | 5.218 (2.908)                | 4.49, 0.0364 |
| Others                | 33        | 29.73      | 4.000 (2.398)                |              |
| <i>Education</i>      |           |            |                              |              |
| Less than 4 yr degree |           |            | 4.0 (2.3)                    | 8.60, 0.0041 |
| 4 yr degree or higher |           |            | 5.5 (3.0)                    |              |

**Table S15.** Means and standard deviations for correct answers for each item in the 10-question Annual Plant Knowledge Test given to participants during the survey portion of an in-lab (screen) eye tracking study at three locations: Apopka, FL (Sept 2018, N=97), College Station, TX (Oct 2018, N=105) and East Lansing, MI (Oct - Dec 2018, N=110) in Study 8. Overall N, Mean (S.D.) = 311, 4.611 (2.718). The overall Cronbach's alpha for the standardized variables was 0.766.

| Loc'n | N     | Correct | Variable | Mean (SD)     | Alpha |
|-------|-------|---------|----------|---------------|-------|
| FL    | 74    | 1       |          | 0.771 (0.423) | 0.776 |
| FL    | 40    | 2       |          | 0.417 (0.496) | 0.748 |
| FL    | 40    | 3       |          | 0.417 (0.496) | 0.740 |
| FL    | 62    | 4       |          | 0.646 (0.481) | 0.747 |
| FL    | 60    | 5       |          | 0.625 (0.487) | 0.762 |
| FL    | 65    | 6       |          | 0.677 (0.470) | 0.760 |
| FL    | 53    | 7       |          | 0.552 (0.500) | 0.739 |
| FL    | 16    | 8       |          | 0.167 (0.375) | 0.772 |
| FL    | 54    | 9       |          | 0.563 (0.499) | 0.741 |
| FL    | 54    | 10      |          | 0.563 (0.499) | 0.762 |
| FL    | N=97  | Overall |          | 5.396 (2.739) | 0.774 |
| MI    | 66    | 1       |          | 0.600 (0.492) | 0.650 |
| MI    | 35    | 2       |          | 0.318 (0.468) | 0.621 |
| MI    | 45    | 3       |          | 0.409 (0.494) | 0.654 |
| MI    | 44    | 4       |          | 0.400 (0.492) | 0.650 |
| MI    | 36    | 5       |          | 0.327 (0.471) | 0.646 |
| MI    | 58    | 6       |          | 0.527 (0.502) | 0.628 |
| MI    | 43    | 7       |          | 0.391 (0.490) | 0.626 |
| MI    | 11    | 8       |          | 0.100 (0.301) | 0.646 |
| MI    | 51    | 9       |          | 0.464 (0.501) | 0.642 |
| MI    | 54    | 10      |          | 0.491 (0.502) | 0.662 |
| MI    | N=110 | Overall |          | 4.027 (2.364) | 0.667 |
| TX    | 73    | 1       |          | 0.695 (0.463) | 0.799 |
| TX    | 34    | 2       |          | 0.324 (0.470) | 0.785 |
| TX    | 51    | 3       |          | 0.486 (0.502) | 0.795 |
| TX    | 43    | 4       |          | 0.410 (0.494) | 0.797 |
| TX    | 46    | 5       |          | 0.438 (0.499) | 0.782 |
| TX    | 62    | 6       |          | 0.590 (0.494) | 0.799 |
| TX    | 40    | 7       |          | 0.381 (0.488) | 0.787 |
| TX    | 14    | 8       |          | 0.133 (0.342) | 0.795 |
| TX    | 51    | 9       |          | 0.486 (0.502) | 0.798 |
| TX    | 59    | 10      |          | 0.562 (0.499) | 0.800 |
| TX    | N=105 | Overall |          | 4.505 (2.893) | 0.811 |
| All   | 213   | 1       |          | 0.685 (0.465) | 0.757 |
| All   | 109   | 2       |          | 0.350 (0.478) | 0.736 |
| All   | 136   | 3       |          | 0.437 (0.497) | 0.748 |
| All   | 149   | 4       |          | 0.479 (0.500) | 0.746 |
| All   | 142   | 5       |          | 0.457 (0.499) | 0.743 |
| All   | 185   | 6       |          | 0.595 (0.492) | 0.747 |
| All   | 136   | 7       |          | 0.437 (0.497) | 0.735 |
| All   | 41    | 8       |          | 0.132 (0.339) | 0.754 |

|       |     |         |               |       |
|-------|-----|---------|---------------|-------|
| All   | 156 | 9       | 0.502 (0.501) | 0.745 |
| All   | 167 | 10      | 0.537 (0.499) | 0.757 |
| N=311 |     | Overall | 4.611 (2.718) | 0.766 |

**Table S16.** Sociodemographic profiles of respondents in Study 8 (N=311).

| Profile               | Frequency | Percentage | Correct of 10<br>Mean (S.D.) | F, <i>p</i>   |
|-----------------------|-----------|------------|------------------------------|---------------|
| Gender                |           |            |                              |               |
| Male                  |           |            | 4.4 (2.8)                    | n.s.          |
| Female                |           |            | 4.7 (2.7)                    |               |
| Race                  |           |            |                              |               |
| Caucasian             | 227       | 72.99      | 4.952 (2.761)                | 13.74, 0.0002 |
| Others                | 84        | 27.01      | 3.690 (2.380)                |               |
| Education             |           |            |                              |               |
| Less than 4 yr degree |           |            | 4.4 (2.5)                    | n.s.          |
| 4 yr degree or higher |           |            | 4.8 (2.9)                    |               |

**Table S17.** Means and standard deviations for correct answers for each item in the 10-question Annual Plant Knowledge Test given to participants during the survey portion of an in-store (glasses) eye tracking study in Spring 2019 in Study 9. Testing was done in two western (W) and two eastern (E) Michigan garden centers (W-1, N=37; W-2, N=41; E-1, N=39; E-2, N=40). Overall N, Mean (S.D.) = 156, 7.782 (2.011). The overall Cronbach's alpha for the standardized variables was 0.670.

| Loc'n | N Correct | Variable | Mean (SD)     | Alpha*       |
|-------|-----------|----------|---------------|--------------|
| E-2   | 29        | 1        | 0.725 (0.452) | <i>0.589</i> |
| E-2   | 40        | 2        | 1.000 (0.000) | <i>0.634</i> |
| E-2   | 36        | 3        | 0.900 (0.304) | <i>0.586</i> |
| E-2   | 24        | 4        | 0.600 (0.496) | <i>0.565</i> |
| E-2   | 30        | 5        | 0.750 (0.439) | <i>0.551</i> |
| E-2   | 26        | 6        | 0.650 (0.483) | <i>0.629</i> |
| E-2   | 31        | 7        | 0.775 (0.423) | <i>0.626</i> |
| E-2   | 31        | 8        | 0.775 (0.423) | <i>0.603</i> |
| E-2   | 33        | 9        | 0.825 (0.385) | <i>0.581</i> |
| E-2   | 25        | 10       | 0.625 (0.490) | <i>0.635</i> |
|       | N=40      | Overall  | 7.625 (1.983) | 0.627        |
| W-2   | 31        | 1        | 0.756 (0.435) | <i>0.587</i> |
| W-2   | 41        | 2        | 1.000 (0.000) | <i>0.629</i> |
| W-2   | 39        | 3        | 0.951 (0.218) | <i>0.560</i> |
| W-2   | 27        | 4        | 0.659 (0.480) | <i>0.531</i> |
| W-2   | 39        | 5        | 0.951 (0.218) | <i>0.560</i> |
| W-2   | 36        | 6        | 0.878 (0.331) | <i>0.527</i> |
| W-2   | 35        | 7        | 0.854 (0.358) | <i>0.688</i> |
| W-2   | 34        | 8        | 0.829 (0.381) | <i>0.605</i> |
| W-2   | 34        | 9        | 0.829 (0.381) | <i>0.615</i> |
| W-2   | 29        | 10       | 0.707 (0.461) | <i>0.618</i> |
|       | N=41      | Overall  | 8.415 (1.688) | 0.622        |
| W-1   | 22        | 1        | 0.611 (0.494) | <i>0.619</i> |
| W-1   | 35        | 2        | 0.972 (0.167) | <i>0.684</i> |
| W-1   | 32        | 3        | 0.889 (0.319) | <i>0.652</i> |
| W-1   | 20        | 4        | 0.556 (0.504) | <i>0.688</i> |
| W-1   | 33        | 5        | 0.917 (0.280) | <i>0.659</i> |
| W-1   | 24        | 6        | 0.667 (0.478) | <i>0.641</i> |
| W-1   | 30        | 7        | 0.833 (0.378) | <i>0.722</i> |
| W-1   | 31        | 8        | 0.861 (0.351) | <i>0.654</i> |
| W-1   | 28        | 9        | 0.778 (0.422) | <i>0.613</i> |
| W-1   | 24        | 10       | 0.667 (0.478) | <i>0.689</i> |
|       | N=36      | Overall  | 7.750 (2.034) | 0.687        |
| E-1   | 28        | 1        | 0.718 (0.456) | <i>0.683</i> |
| E-1   | 39        | 2        | 1.000 (0.000) | <i>0.700</i> |

|       |     |         |               |              |
|-------|-----|---------|---------------|--------------|
| E-1   | 35  | 3       | 0.897 (0.307) | <i>0.658</i> |
| E-1   | 19  | 4       | 0.487 (0.506) | <i>0.692</i> |
| E-1   | 26  | 5       | 0.667 (0.478) | <i>0.644</i> |
| E-1   | 27  | 6       | 0.692 (0.468) | <i>0.642</i> |
| E-1   | 23  | 7       | 0.590 (0.498) | <i>0.653</i> |
| E-1   | 28  | 8       | 0.718 (0.456) | <i>0.678</i> |
| E-1   | 33  | 9       | 0.846 (0.366) | <i>0.651</i> |
| E-1   | 27  | 10      | 0.692 (0.468) | <i>0.668</i> |
| N=39  |     | Overall | 7.308 (2.190) | 0.691        |
|       | 110 | 1       | 0.705 (0.457) | 0.642        |
|       | 155 | 2       | 0.994 (0.080) | 0.685        |
|       | 142 | 3       | 0.910 (0.287) | 0.615        |
|       | 90  | 4       | 0.577 (0.496) | 0.649        |
|       | 128 | 5       | 0.821 (0.385) | 0.622        |
|       | 113 | 6       | 0.724 (0.448) | 0.626        |
|       | 119 | 7       | 0.763 (0.427) | 0.676        |
|       | 124 | 8       | 0.795 (0.405) | 0.649        |
|       | 128 | 9       | 0.821 (0.385) | 0.626        |
|       | 105 | 10      | 0.673 (0.471) | 0.664        |
| N=156 |     | Overall | 7.782 (2.001) | 0.670        |

\*Alphas in italics represent the raw variables. All participants at this garden center correctly answered Item 2.

**Table S18.** Sociodemographic profiles of respondents of Study 9 (N=156).

| Profile               | Frequency | Percentage | Correct of 10<br>Mean (S.D.) | F, <i>p</i>  |
|-----------------------|-----------|------------|------------------------------|--------------|
| <i>Gender</i>         |           |            |                              |              |
| Male                  |           |            | 7.6 (2.2)                    | n.s.         |
| Female                |           |            | 7.8 (2.0)                    |              |
| <i>Race</i>           |           |            |                              |              |
| Caucasian             | 145       | 92.95      | 7.869 (1.948)                | 3.95, 0.0485 |
| Others                | 11        | 7.05       | 6.636 (2.420)                |              |
| <i>Education</i>      |           |            |                              |              |
| Less than 4 yr degree |           |            | 7.5 (2.0)                    | n.s.         |
| 4 yr degree or higher |           |            | 7.9 (2.0)                    |              |



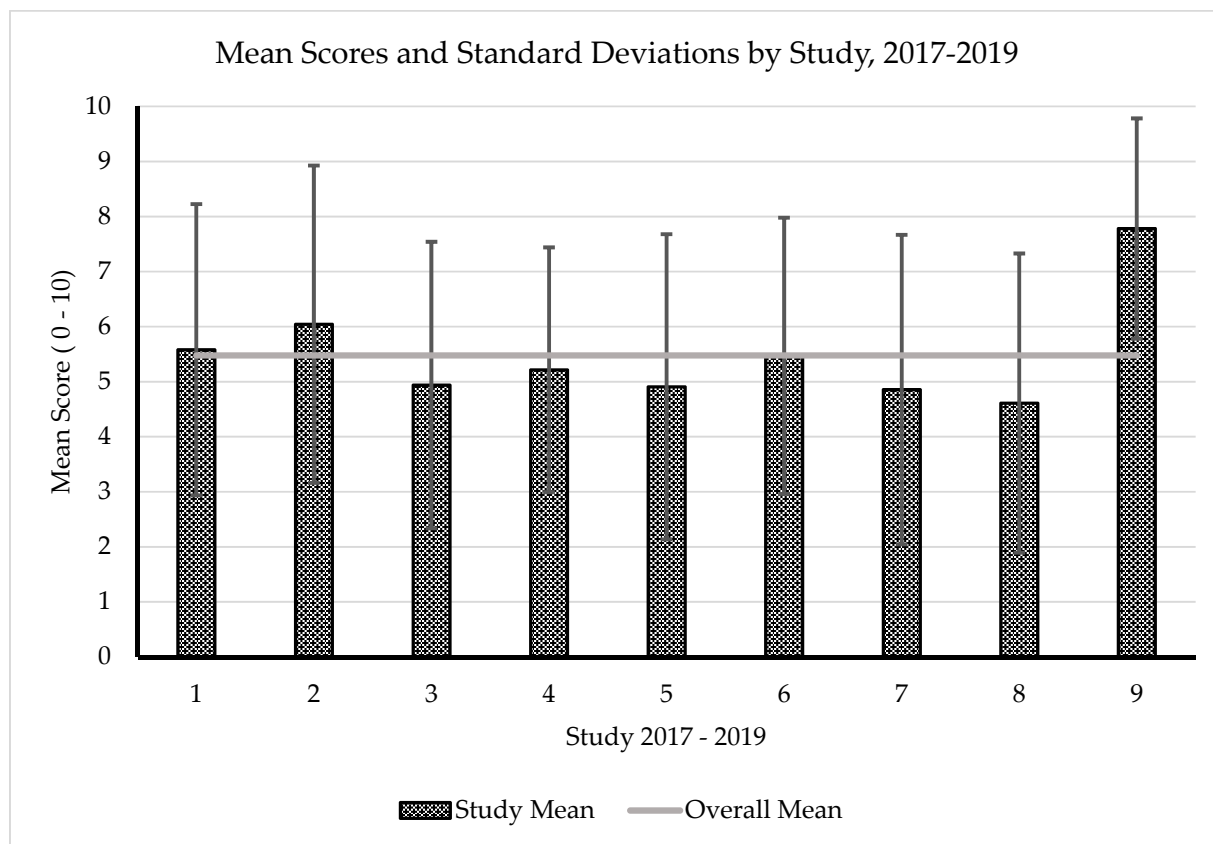

**Figure S2.** Graphical representation of mean scores and standard deviations for the ten quiz items to the combined participants (N=1129) of nine studies, 2017 – 2020. Quiz is designed to test participant horticultural knowledge. Items are scored as correct (1) or incorrect (0). The overall mean score is included for reference.

### Supplementary 8. Principal Component Analyses

The first principal component analysis produced a two-component solution with a Cronbach's alpha = 0.8280 and accounting for 48.6% of the variance in the items (Table S19). The first component to emerge was Active Landscape Enjoyment which consisted of 15 items: "I like to grow vegetables", "I grow vegetables, herbs, or fruits in my landscape", "Working with plants outdoors is a valuable way to spend time", "Working with plants outdoors is a pleasant break from my other activities", "I like to enjoy the harvest from my outdoor vegetables and herbs", "I have a landscape that yields fresh produce", "I like to grow herbs", "I get great satisfaction from working in the outdoor landscaped areas around my home", "I like working with outdoor plants", "A landscape that produces food (vegetables, fruits, herbs)", "The outdoor space around my home is an important place for my leisure activities", "My family makes a lot of use of the outdoor space at our home", "I enjoy showing friends around my property or landscaped areas", "Large areas of garden beds at your property", and "I hardly ever use the outdoor space at my home for recreation".

The second component to emerge was Landscape Aesthetic which contained six items: "A vibrant landscape", "A landscape that fits into the neighborhood", "A lush landscape", "A landscape that adds value to my home", "A landscape that is the envy of the neighbors", and "A well-irrigated landscape".

**Table S19.** Principal component analysis of landscape questions adapted from Syme et al. [52] and Behe et al. [8].

| Item                                                                                  | Active Landscape Enjoyment | Landscape Aesthetic |
|---------------------------------------------------------------------------------------|----------------------------|---------------------|
| I like to grow vegetables.                                                            | 0.777                      | -0.375              |
| I grow vegetables, herbs, or fruits in my landscape.                                  | 0.763                      | -0.269              |
| Working with plants outdoors is a valuable way to spend time.                         | 0.751                      | -0.03               |
| Working with plants outdoors is a pleasant break from my other activities.            | 0.747                      | -0.006              |
| I like to enjoy the harvest from my outdoor vegetables and herbs.                     | 0.742                      | -0.384              |
| I have a landscape that yields fresh produce.                                         | 0.704                      | -0.229              |
| I like to grow herbs.                                                                 | 0.703                      | -0.331              |
| I get great satisfaction from working in the outdoor landscaped areas around my home. | 0.688                      | 0.069               |
| I like working with outdoor plants.                                                   | 0.653                      | -0.037              |
| A landscape that produces food (vegetables, fruits, herbs).                           | 0.643                      | -0.168              |
| The outdoor space around my home is an important place for my leisure activities.     | 0.619                      | 0.281               |
| My family makes a lot of use of the outdoor space at our home.                        | 0.575                      | 0.261               |
| I enjoy showing friends around my property or landscaped areas.                       | 0.561                      | 0.34                |
| Large areas of garden beds at your property.                                          | 0.559                      | 0.277               |
| I hardly ever use the outdoor space at my home for recreation.                        | -0.548                     | -0.222              |
| A vibrant landscape.                                                                  | 0.106                      | 0.714               |
| A landscape that fits into the neighborhood.                                          | -0.055                     | 0.635               |
| A lush landscape.                                                                     | 0.303                      | 0.61                |
| A landscape that adds value to my home.                                               | 0.142                      | 0.588               |

|                                                            |        |        |
|------------------------------------------------------------|--------|--------|
| A landscape that is the envy of the neighbors.             | 0.174  | 0.587  |
| A well-irrigated landscape.                                | 0.062  | 0.573  |
| Percent of Variance                                        | 33.2%  | 15.6%  |
| Overall                                                    |        |        |
| Variance Explained by Each Factor Before Rotation          | 6.9630 | 3.2510 |
| Variance Explained by Each Factor With Orthogonal Rotation | 6.8950 | 3.5160 |
| Cronbach Coefficient Alpha -- Raw Variables                | 0.8280 | 0.7610 |
| Cronbach Coefficient Alpha - Standardized Variables        | 0.8130 | 0.7680 |
| Kaiser-Meyer-Olkin Measure of Sample Adequacy              | 0.8740 |        |

For the second Principal Component Analysis, the analysis focused on plant expertise and involvement items. The component that emerged, Plant Expertise, with high reliability (Cronbach's alpha = 0.9540) and accounted for 51.5% of the variance in the items (Table S20). Of the 25 items in the initial analysis, 22 loaded onto the component including: "I can recognize many names of plants", "I know a lot about plants", "I consider myself knowledgeable about plants", "I am knowledgeable about plants", "I can recall many plants from memory", "My knowledge of plants helps me to understand very technical information about them", "I am a plant expert", "Compared to other people, I am interested in plants", "I keep current on the most recent developments about plants", "I can recall product-specific attributes about plants", "I am involved with growing plants", "I automatically know which plants to buy", "I enjoy learning about l plants", "I enjoy learning about l plants", "I can recognize many names of plants", "I think that plants are boring to exciting", "I think that plants are of no concern to me to of great concern to me", "I think that plants are mundane to fascinating", "I grow plants around my home", "I think that plants mean nothing to me to are of great importance to me", "I think that plants are uninteresting to interesting", "I can immediately identify my preferred plants even if they are displayed with others", and "At the place of purchase, I can visually detect my preferred plants without much effort".

**Table S20.** Principal component analysis of plant expertise questions.

| Item                                                                                 | Plant Expertise |
|--------------------------------------------------------------------------------------|-----------------|
| I can recognize many names of plants.                                                | 0.876           |
| I know a lot about plants.                                                           | 0.876           |
| I consider myself knowledgeable about plants.                                        | 0.870           |
| I am knowledgeable about plants.                                                     | 0.868           |
| I can recall many plants from memory.                                                | 0.776           |
| My knowledge of plants helps me to understand very technical information about them. | 0.766           |
| I am a plant expert.                                                                 | 0.754           |
| Compared to other people, I am interested in plants.                                 | 0.746           |
| I keep current on the most recent developments about plants.                         | 0.731           |
| I can recall product-specific attributes about plants.                               | 0.730           |
| I am involved with growing plants.                                                   | 0.725           |
| I automatically know which plants to buy.                                            | 0.699           |
| I enjoy learning about l plants.                                                     | 0.699           |
| I can recognize many names of plants.                                                | 0.686           |

|                                                                                          |         |
|------------------------------------------------------------------------------------------|---------|
| I think that plants are boring to exciting.                                              | 0.650   |
| I think that plants are of no concern to me to of great concern to me.                   | 0.630   |
| I think that plants are mundane to fascinating.                                          | 0.607   |
| I grow plants around my home.                                                            | 0.598   |
| I think that plants mean nothing to me to are of great importance to me.                 | 0.594   |
| I think that plants are uninteresting to interesting                                     | 0.592   |
| I can immediately identify my preferred plants even if they are displayed with others.   | 0.592   |
| At the place of purchase, I can visually detect my preferred plants without much effort. | 0.578   |
| <hr/>                                                                                    |         |
| Percent of Variance                                                                      | 51.5%   |
| Overall                                                                                  |         |
| Variance Explained by Each Factor Before Rotation                                        | 10.3670 |
| Variance Explained by Each Factor With Orthogonal Rotation                               | 11.3310 |
| Cronbach Coefficient Alpha -- Raw Variables                                              | 0.9540  |
| Cronbach Coefficient Alpha - Standardized Variables                                      | 0.9540  |
| Kaiser-Meyer-Olkin Measure of Sample Adequacy                                            | 0.9380  |
| <hr/>                                                                                    |         |
